# Supplementary material for: Hierarchically porous carbon materials with controllable proportion of micropore area by dual-activator synthesis for high-performance supercapacitors
Source: Royal Society of Chemistry journal article supplement (doi:10.1039/c8ta04777d), 2018-01-01
Supplement: c8ta04777d1.pdf [file c8ta04777d1.pdf]

## Electronic Supplementary Information

### Hierarchically Porous Carbon Materials with Controllable Proportion of Micropore area by Dual-activator Synthesis for High-Performance Supercapacitors

He Xu,<sup>a</sup> ChengkeWu,<sup>a</sup> XianjunWei,<sup>a</sup> Shuyan Gao<sup>\*a,b</sup>

<sup>a</sup>School of Chemistry and Chemical Engineering, Henan Normal University, Xinxiang, Henan 453007, P. R. China.

E-mail: shuyangao@htu.cn; Fax: +86 3733329097; Tel: +86 3733329097

<sup>b</sup>School of Environment, Henan Normal University, Xinxiang, Henan 453007, P. R. China

## Mechanism of KOH activation

It is noteworthy that KOH was used as the activating agent to construct micropores and control the micropores size distributions. During the KOH activation progress, the main products were char, CO, CO<sub>2</sub>, H<sub>2</sub>O, H<sub>2</sub>, K, K<sub>2</sub>O and K<sub>2</sub>CO<sub>3</sub> at the temperatures under 700°C, and several continuous and/or simultaneous reactions were contained and presented in following Equations (S1)-(S5).<sup>[S1, S2]</sup> In chemical activation at around 400 °C, K<sub>2</sub>O would be generated due to the dehydration of KOH (Equation (1)).<sup>[S3]</sup> Then H<sub>2</sub> and CO<sub>2</sub> would be produced by the Equations (S2) and (S3). Afterwards, the K<sub>2</sub>O and CO<sub>2</sub> can be converted into K<sub>2</sub>CO<sub>3</sub> (Equation (S4)).<sup>[S1, S4]</sup>

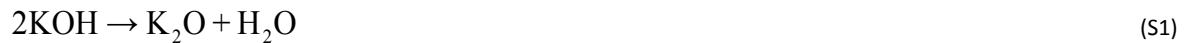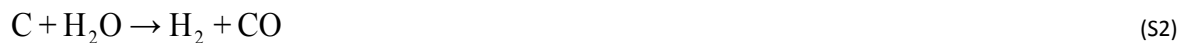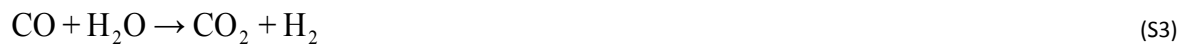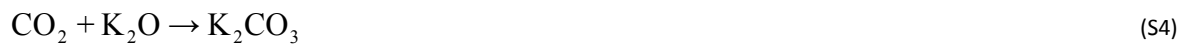

In addition, the reactions between KOH and carbon materials include solid–solid or solid–liquid processes at about 570 °C that occur by the following stoichiometric redox reaction (Equation (S5)).<sup>[S1]</sup>

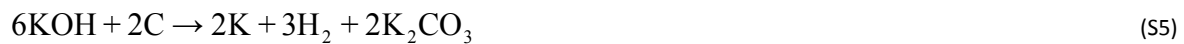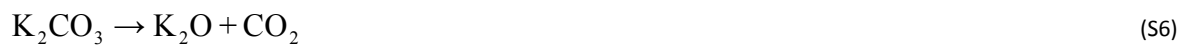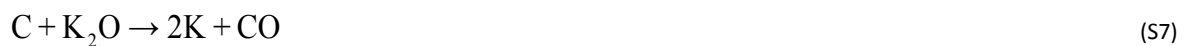

Moreover, if the activation temperature achieves over than 700 °C, the as-formed K<sub>2</sub>CO<sub>3</sub> (Equation (S4) and (S5)) would transform into CO<sub>2</sub> and K<sub>2</sub>O (Equation (S6)), and the K<sub>2</sub>O can be further reacted with carbon to form metallic K (Equation (S7)).<sup>[S5-S6]</sup> It is worth pointing out that metallic K (Equation (S5) and (S7)) can diffuse into the carbon framework efficiently and expands the lattice leading to a rise for the increase of pore volume. Furthermore, in physical activation, the escape of H<sub>2</sub>, CO<sub>2</sub>, CO and H<sub>2</sub>O gas from the biomass carbon can also transform some micropores into mesopores by opening up the closed pores.<sup>[S2]</sup> After removing the intercalated metallic K and K-containing compounds by the hydrochloric acid washing, the expanded carbon lattices cannot be restored, therefore reasonably generating pores.<sup>[S5, S7]</sup>

### Mechanism of $C_3N_3Na_3S_3$ activation

From the TGA curve of  $C_3N_3Na_3S_3$  salt (Fig. S2a), it can be found that the slightly weight loss at 100 °C and the obvious weight loss from 600 to 800 °C. The slightly weight loss at 100 °C may be caused by water evaporation. The obvious weight loss may be owing to the decomposition of  $C_3N_3Na_3S_3$  when activation temperature was over 600 °C. This result were associated with continuous reactions and decomposition of functional groups.<sup>[S8-S10]</sup> The main products may include char, CO, CO<sub>2</sub>, H<sub>2</sub>O, H<sub>2</sub>, NH<sub>3</sub>, and N, O-containing compounds. Therefore the escape of H<sub>2</sub>, CO<sub>2</sub>, CO, H<sub>2</sub>O and NH<sub>3</sub> gas from the biomass carbon materials would contribute to the forming of mesopores and macropores.<sup>[S11-S13]</sup> After removing the metal residue (such as Na<sup>+</sup>) by the hydrochloric acid washing, the expanded carbon lattices cannot be restored, therefore reasonably generating pores showing the activated effect.<sup>[S14,S15]</sup>

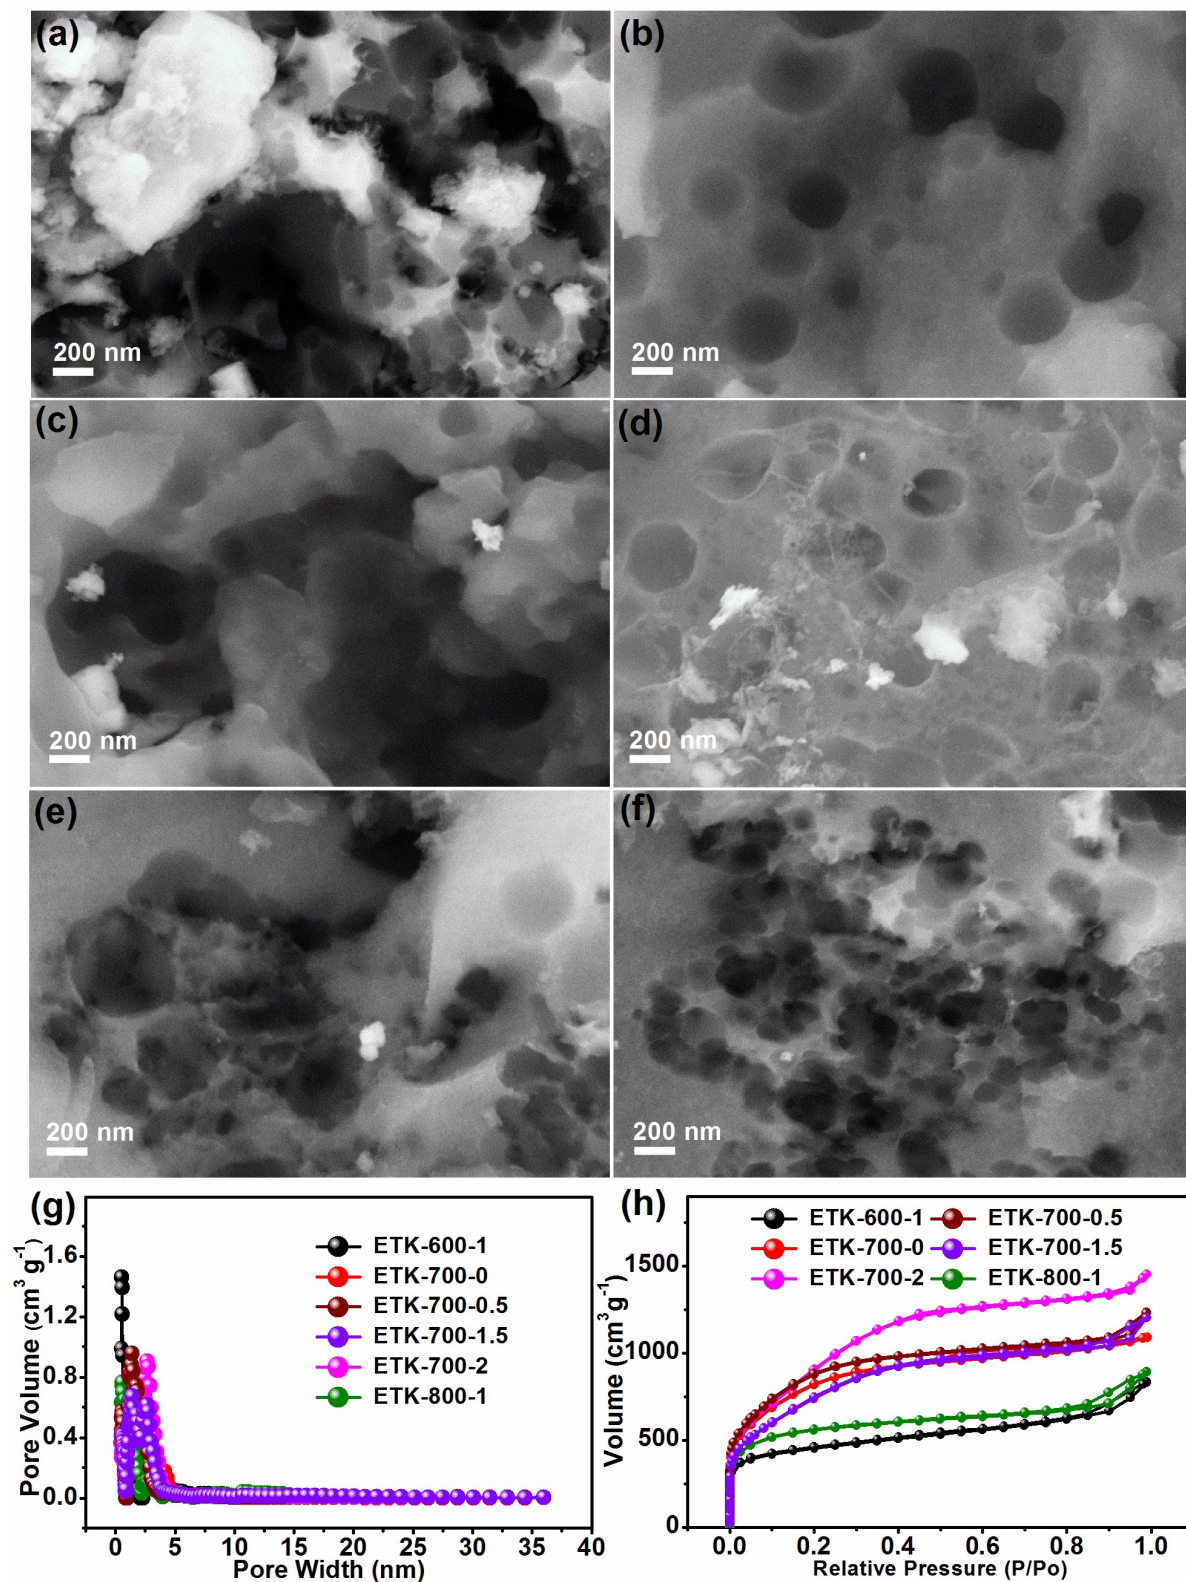

**Fig. S1** SEM images of different activated samples: (a) ETK-600-1, (b) ETK-700-0, (c) ETK-700-0.5, (d) ETK-700-1.5, (e) ETK-700-2, and (f) ETK-800-1; (g) pore size distributions of ETK-600-1, ETK-700-0, ETK-700-0.5, ETK-700-1.5, ETK-700-2, ETK-800-1; (h)  $\text{N}_2$  adsorption/desorption isotherms of ETK-600-1, ETK-700-0, ETK-700-0.5, ETK-700-1.5, ETK-700-2, ETK-800-1.

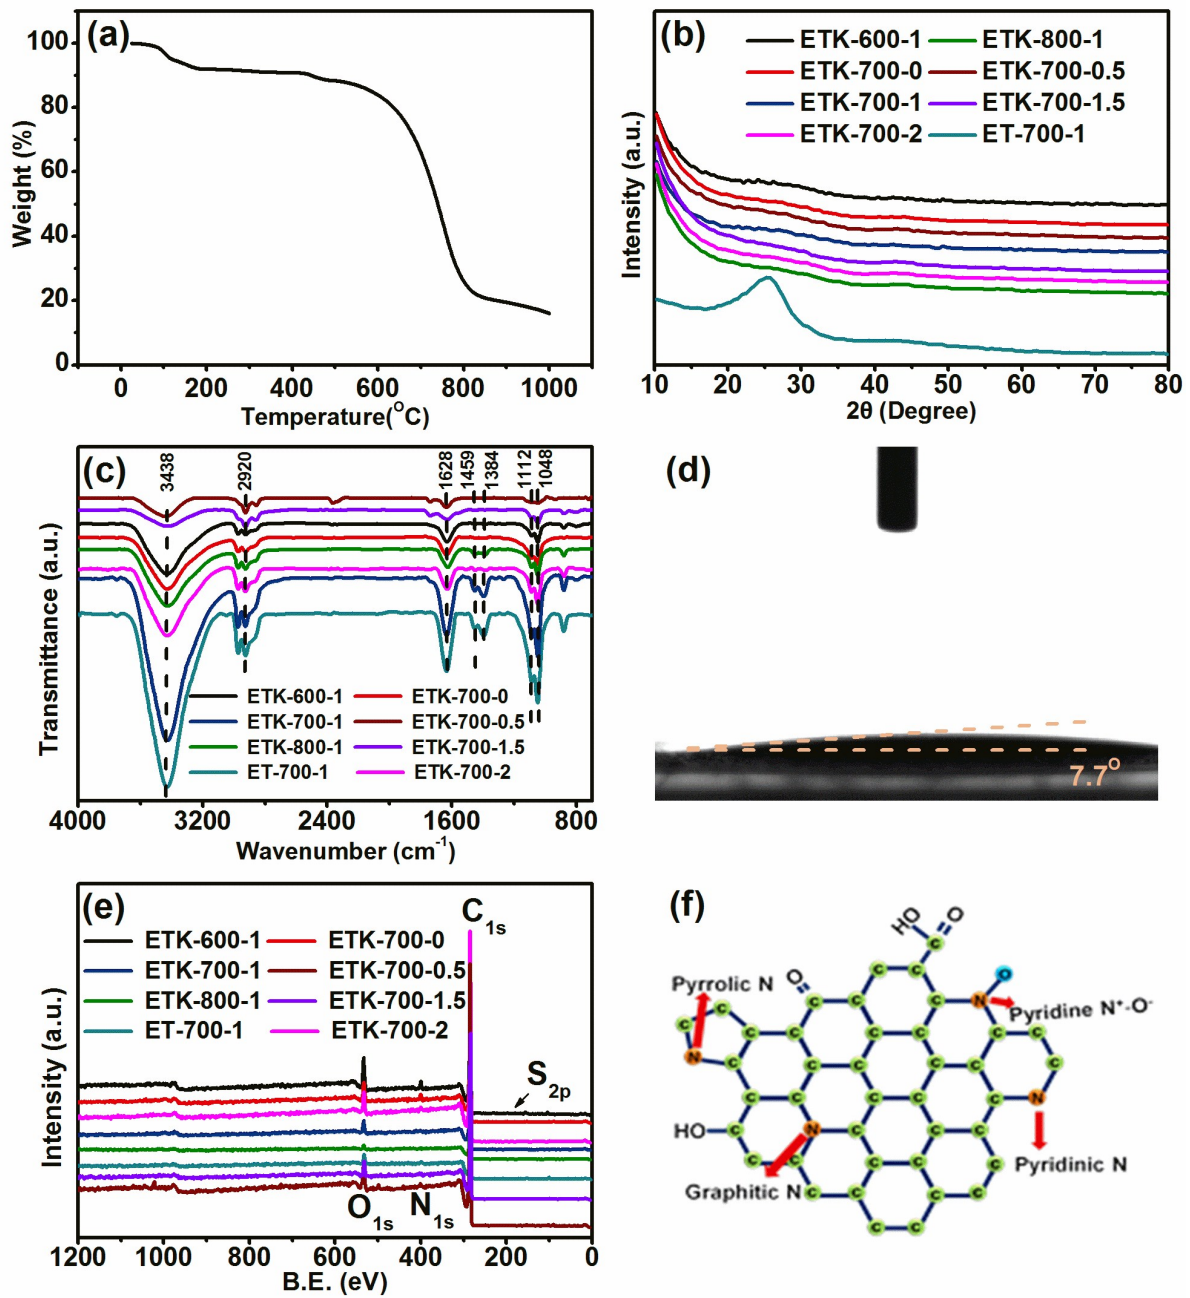

**Fig. S2** (a) TGA curve of the  $C_3N_3Na_3S_3$  salt in  $N_2$  atmosphere, (b) XRD patterns for all samples, (c) FTIR spectra of all samples, (d) contact angle of ETK-700-1, (e) XPS spectra of all samples, (f) schematic model of N-containing and O-containing functional surface groups on carbon.

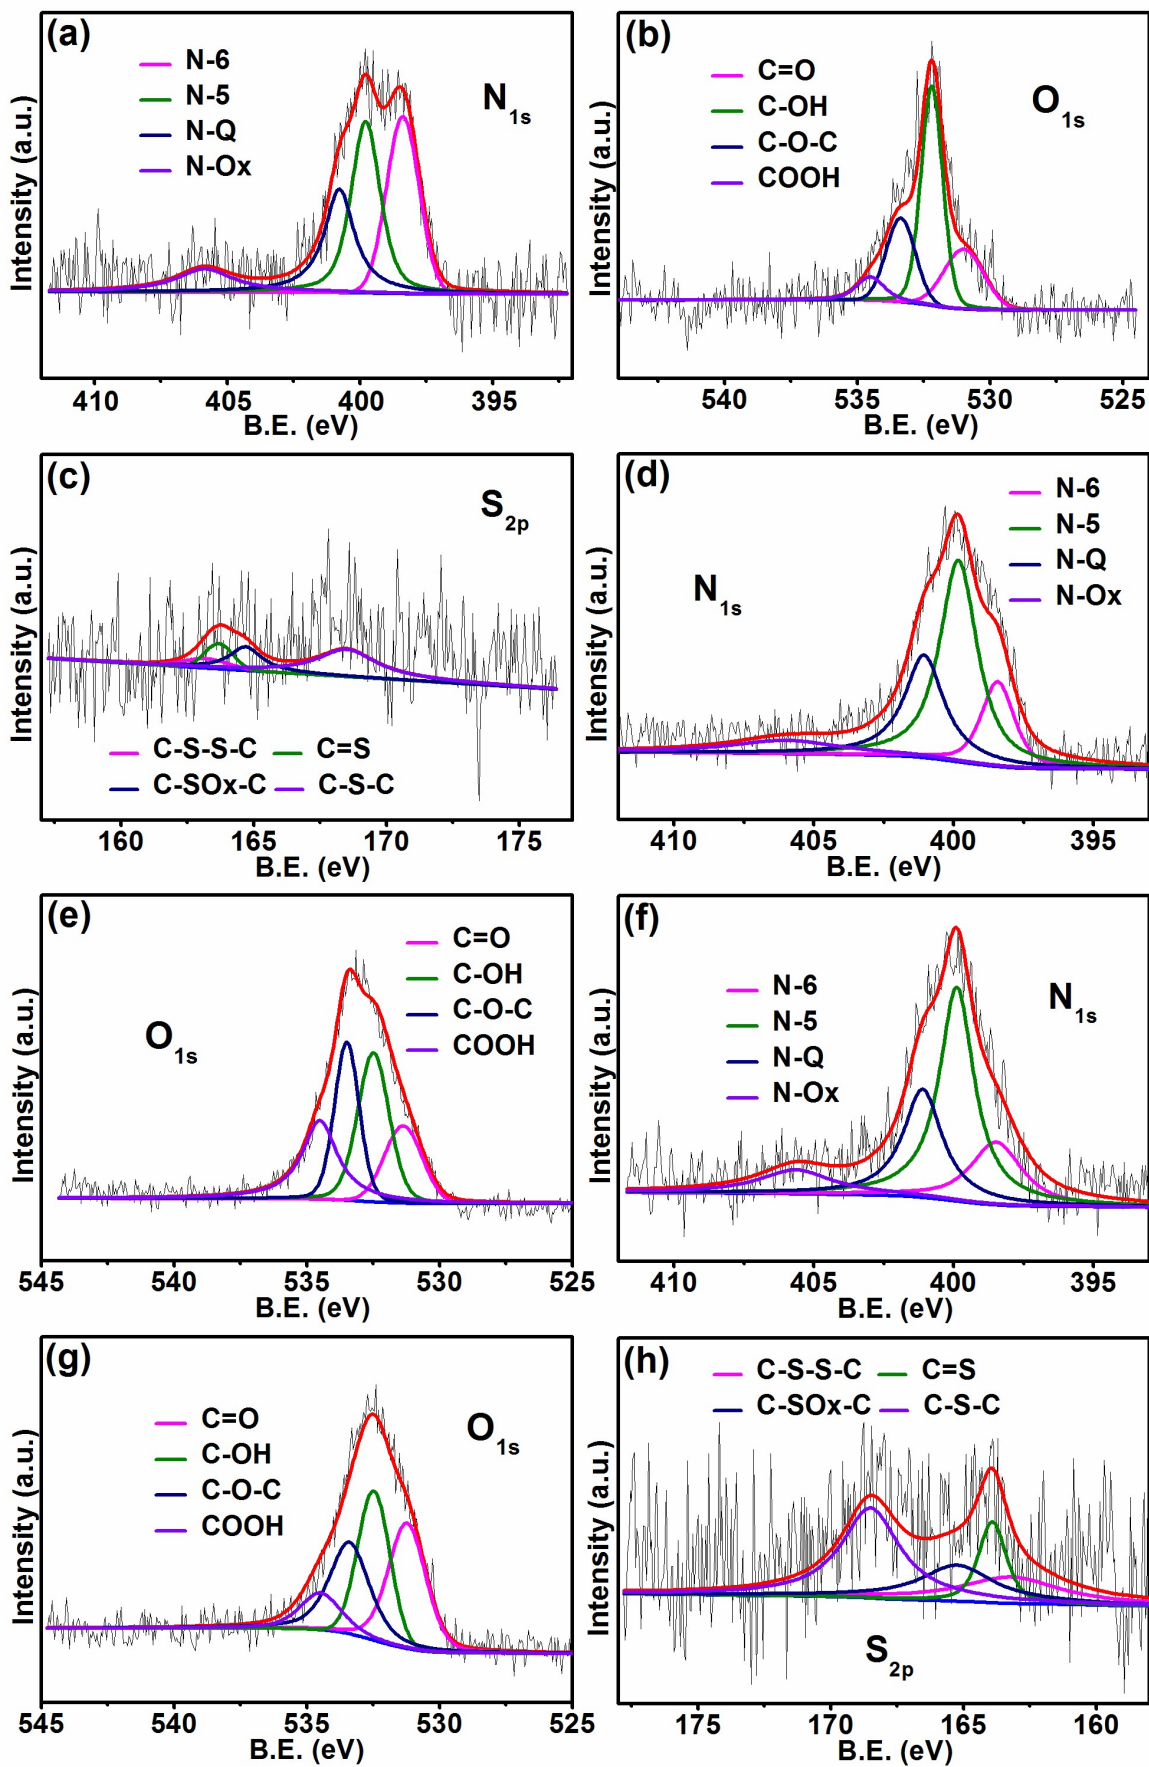

**Fig. S3** (a)  $N_{1s}$ , (b)  $O_{1s}$  and (c)  $S_{2p}$  high-resolution XPS spectra of ET-700-1 with deconvoluted peaks, (d)  $N_{1s}$ , and (e)  $O_{1s}$  high-resolution XPS spectra of ETK-600-1 with deconvoluted peaks, (f)  $N_{1s}$ , (g)  $O_{1s}$  and (h)  $S_{2p}$  high-resolution XPS spectra of ETK-700-0 with deconvoluted peaks.

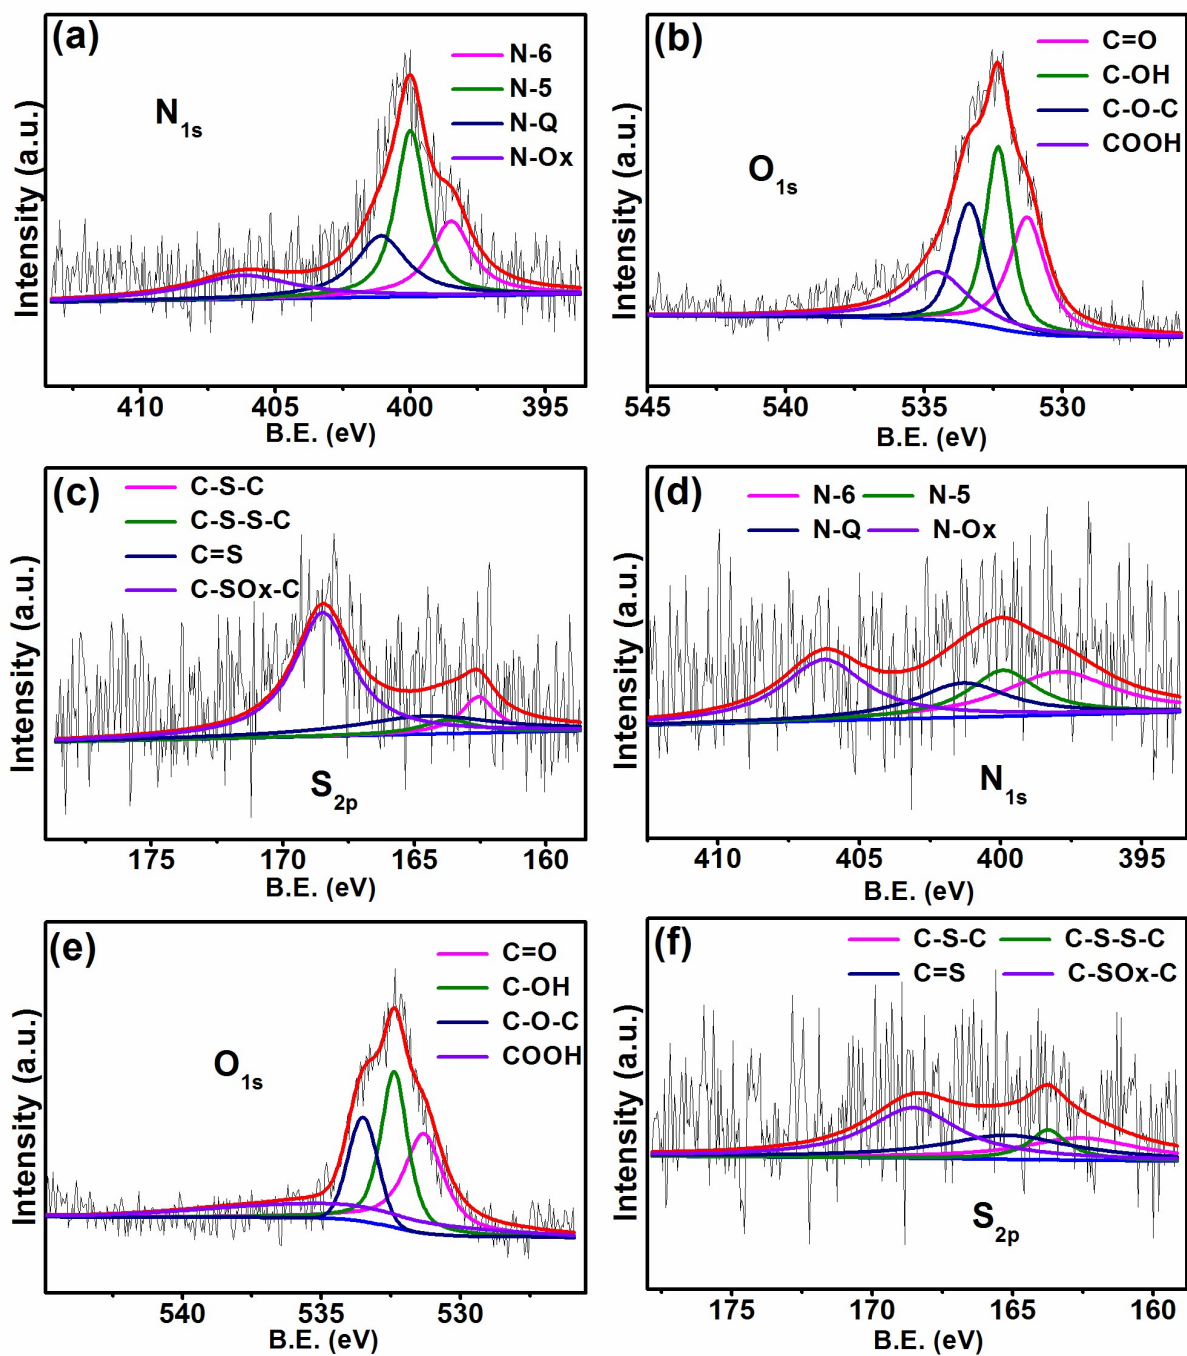

**Fig. S4** (a)  $N_{1s}$ , (b)  $O_{1s}$  and (c)  $S_{2p}$  high-resolution XPS spectra of ETK-700-0.5 with deconvoluted peaks, (d)  $N_{1s}$ , (e)  $O_{1s}$  and (f)  $S_{2p}$  high-resolution XPS spectra of ETK-700-1.5 with deconvoluted peaks.



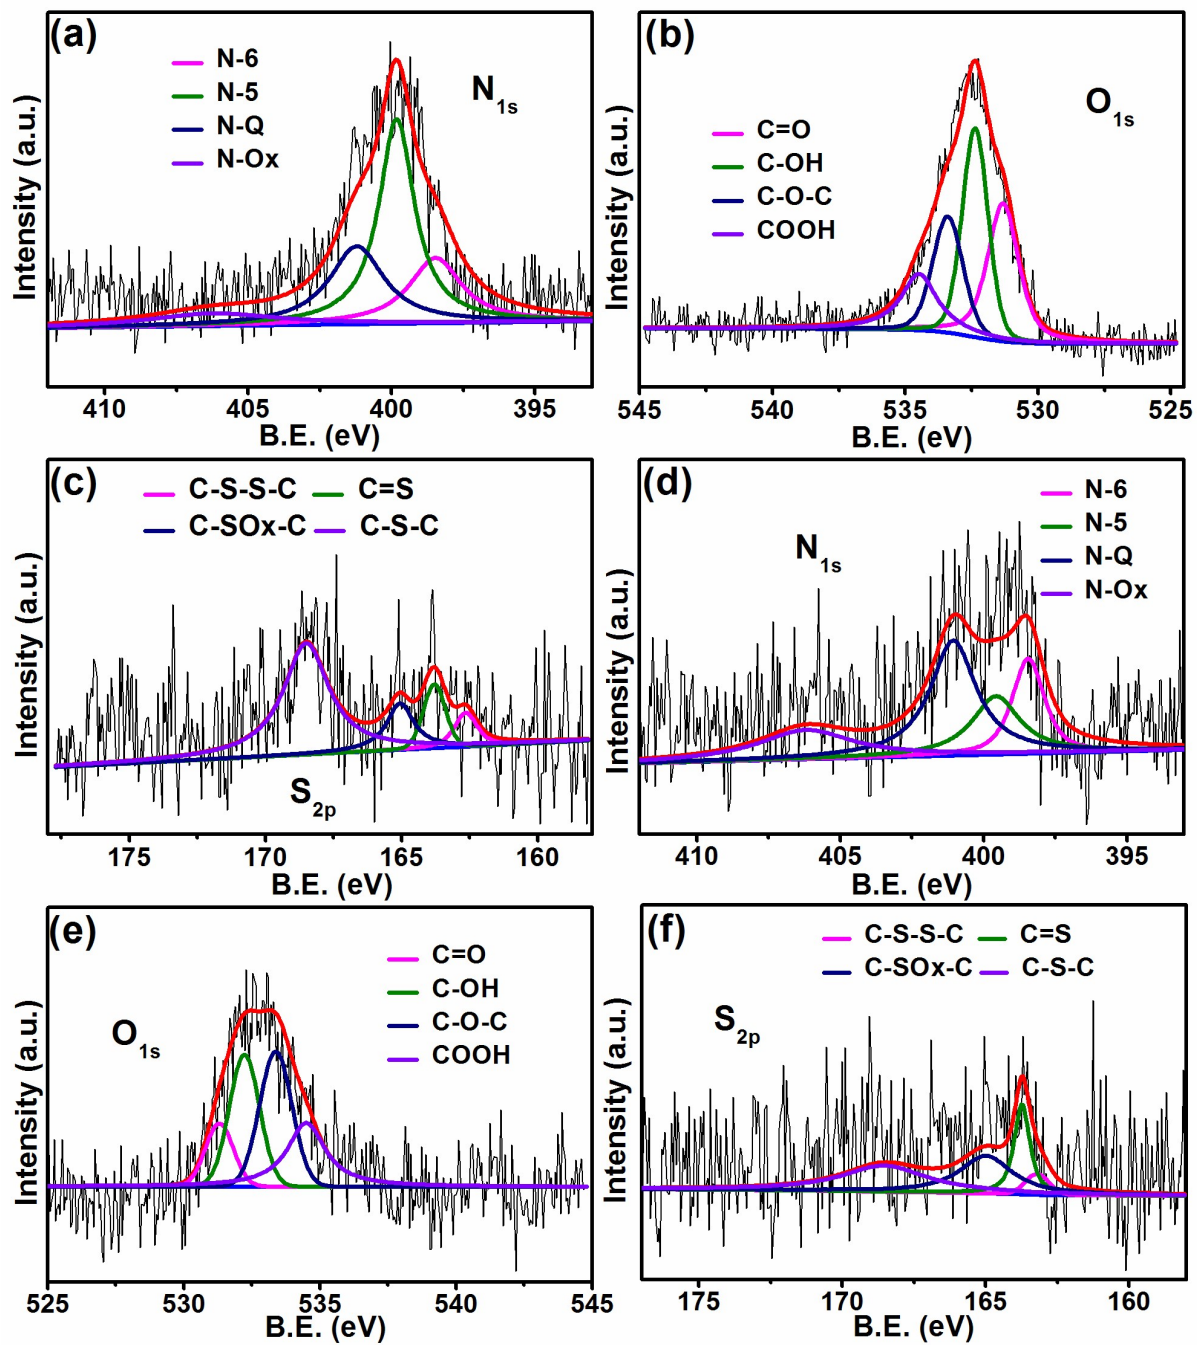

**Fig. S5** (a)  $N_{1s}$ , (b)  $O_{1s}$  and (c)  $S_{2p}$  high-resolution XPS spectra of ETK-700-2 with deconvoluted peaks, (d)  $N_{1s}$ , and (e)  $O_{1s}$  and (f)  $S_{2p}$  high-resolution XPS spectra of ETK-800-1 with deconvoluted peaks.

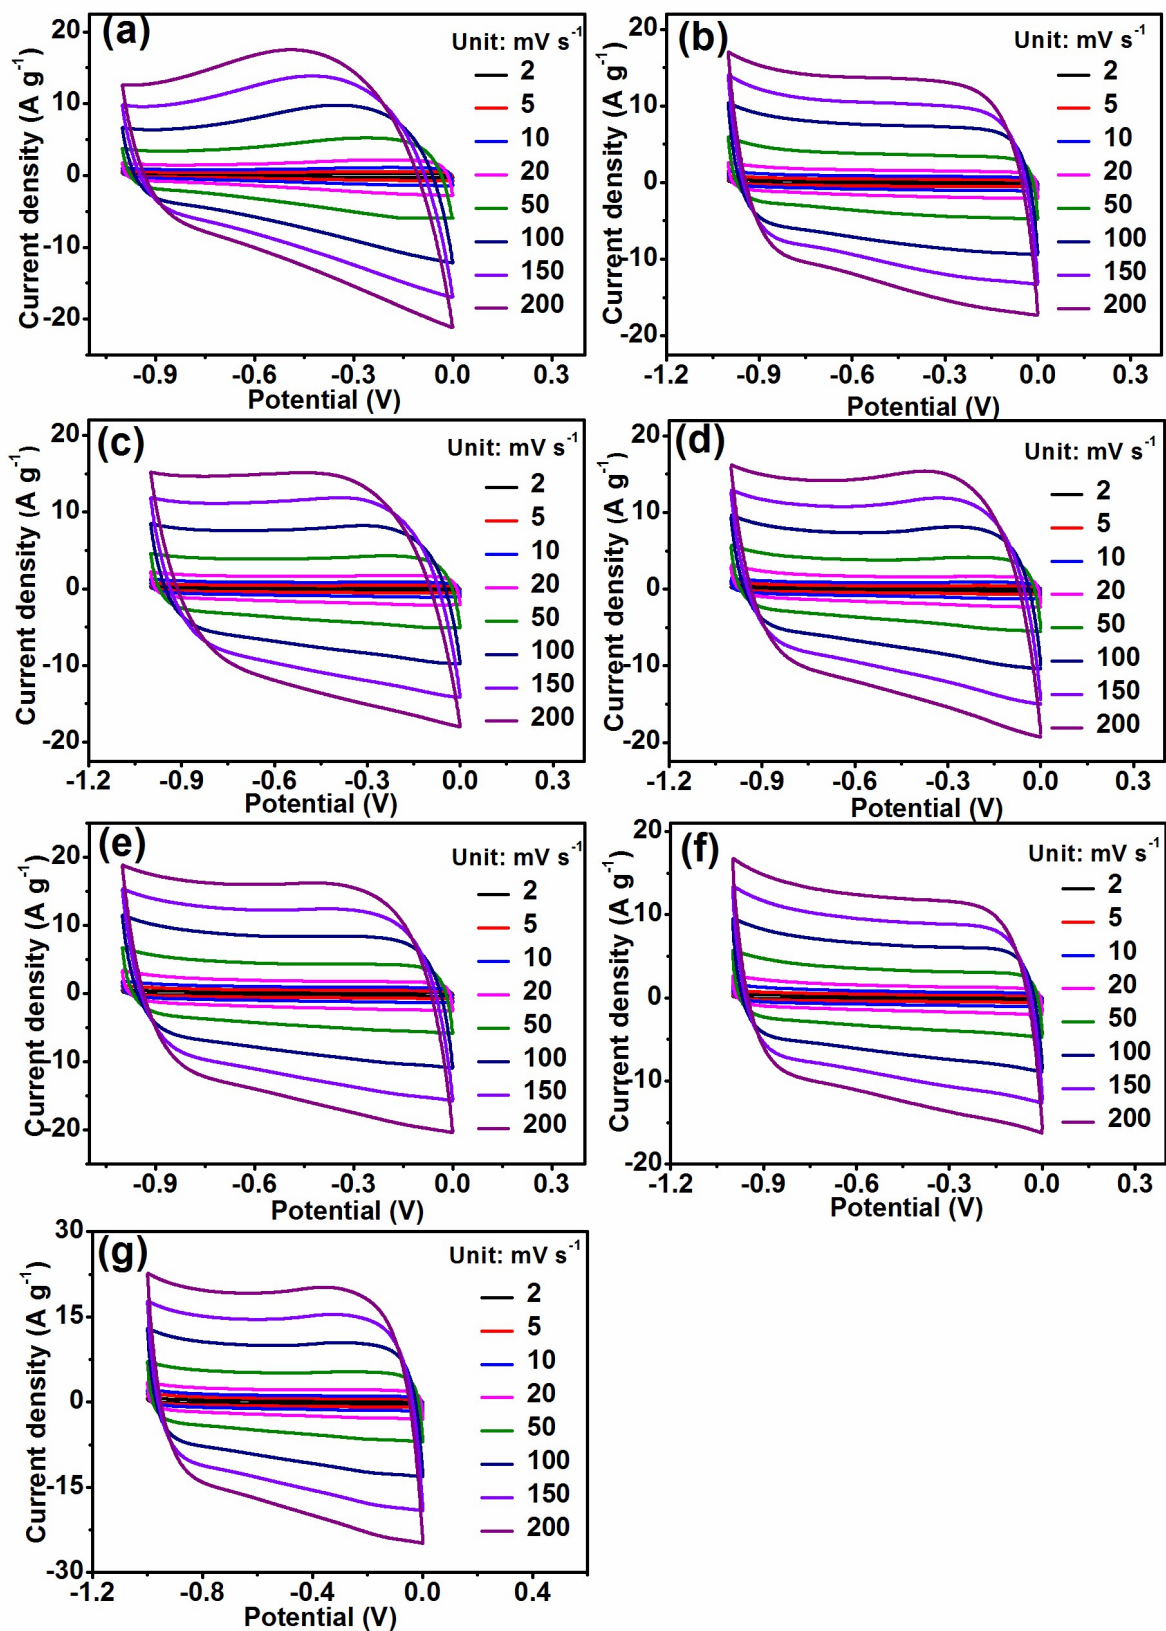

Fig. S6 CV curves of the obtained samples under the different sweep rates: (a) ETK-600-1, (b) ETK-700-0, (c) ETK-700-0.5, (d) ETK-700-1.5, (e) ETK-700-2, (f) ETK-800-1, (g) ETK-700-1.

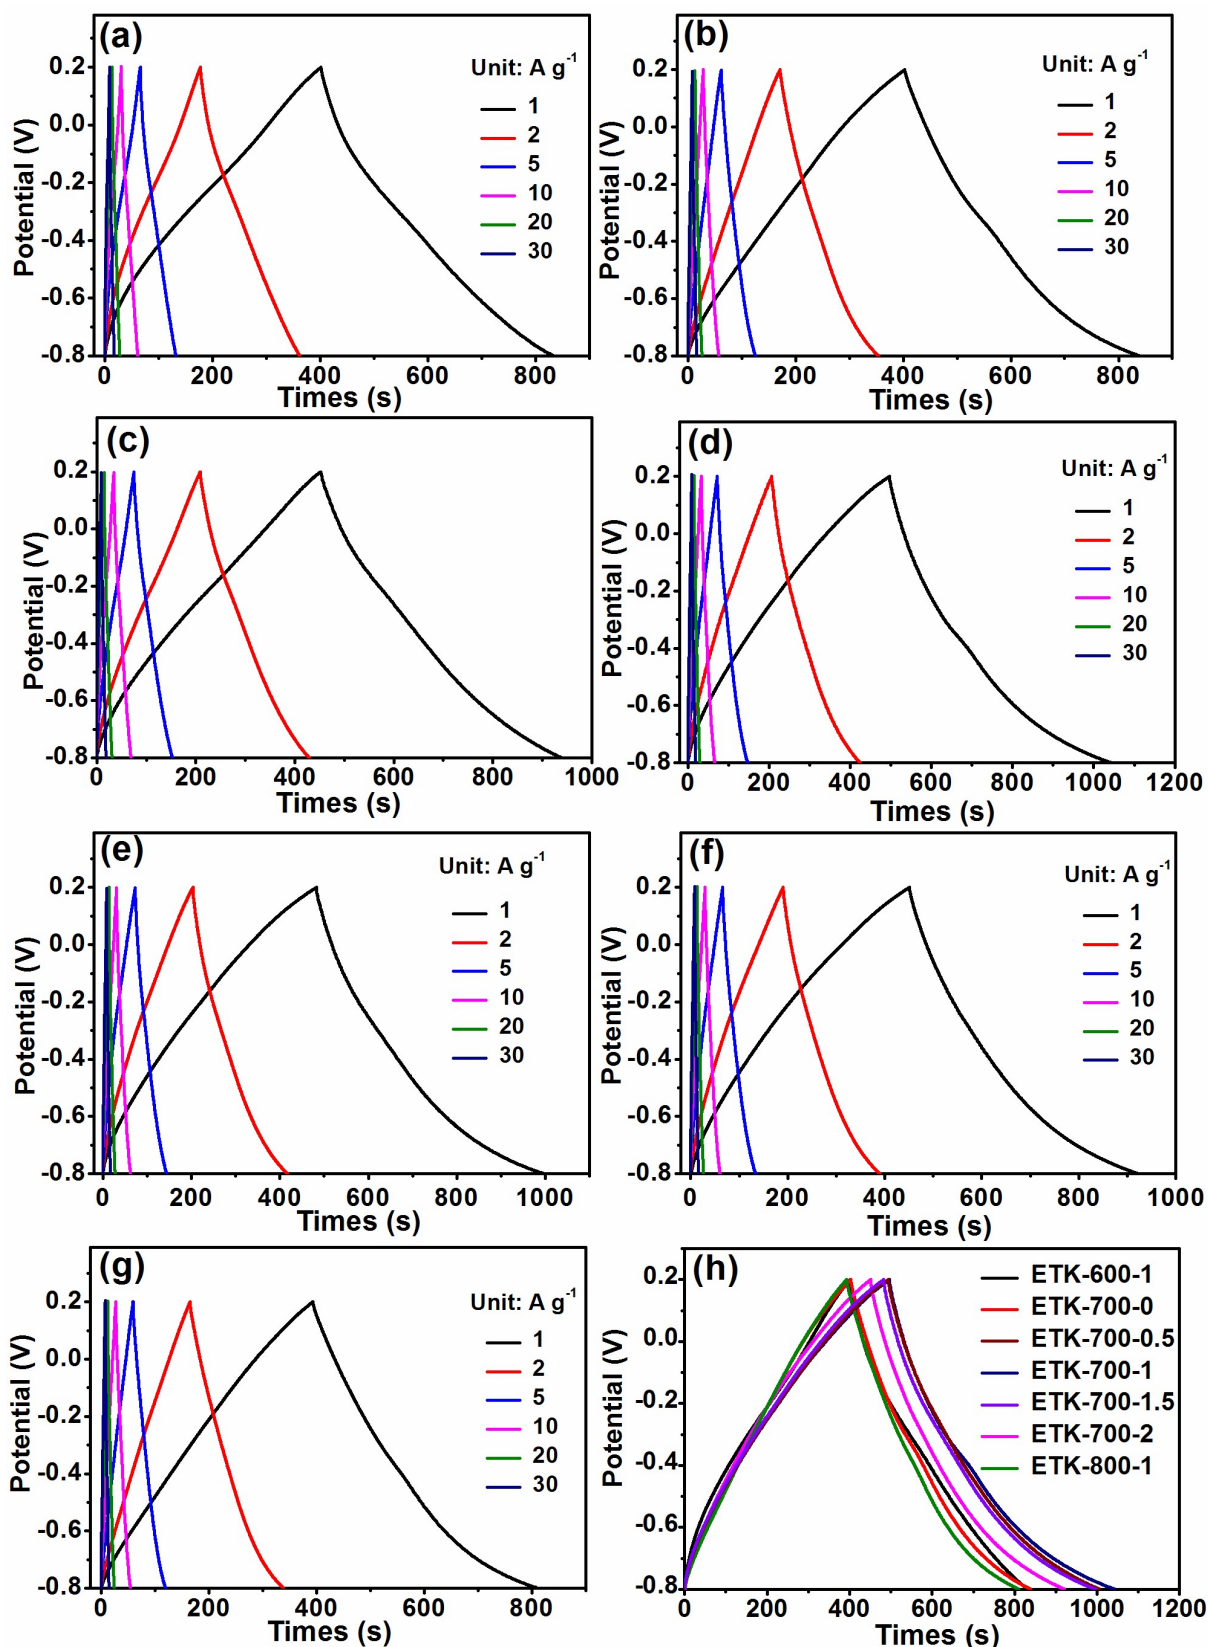

**Fig. S7** GCD curves of the obtained samples at various current densities from 1 to 30  $\text{A g}^{-1}$  in 1  $\text{mol L}^{-1}$   $\text{H}_2\text{SO}_4$  electrolyte in the three-electrode system: (a) ETK-600-1, (b) ETK-700-0, (c) ETK-700-0.5, (d) ETK-700-1, (e) ETK-700-1.5, (f) ETK-700-2, (g) ETK-800-1; (h) the GCD curves of the obtained samples at 1  $\text{A g}^{-1}$  in 1  $\text{mol L}^{-1}$   $\text{H}_2\text{SO}_4$  electrolyte in the three-electrode system.

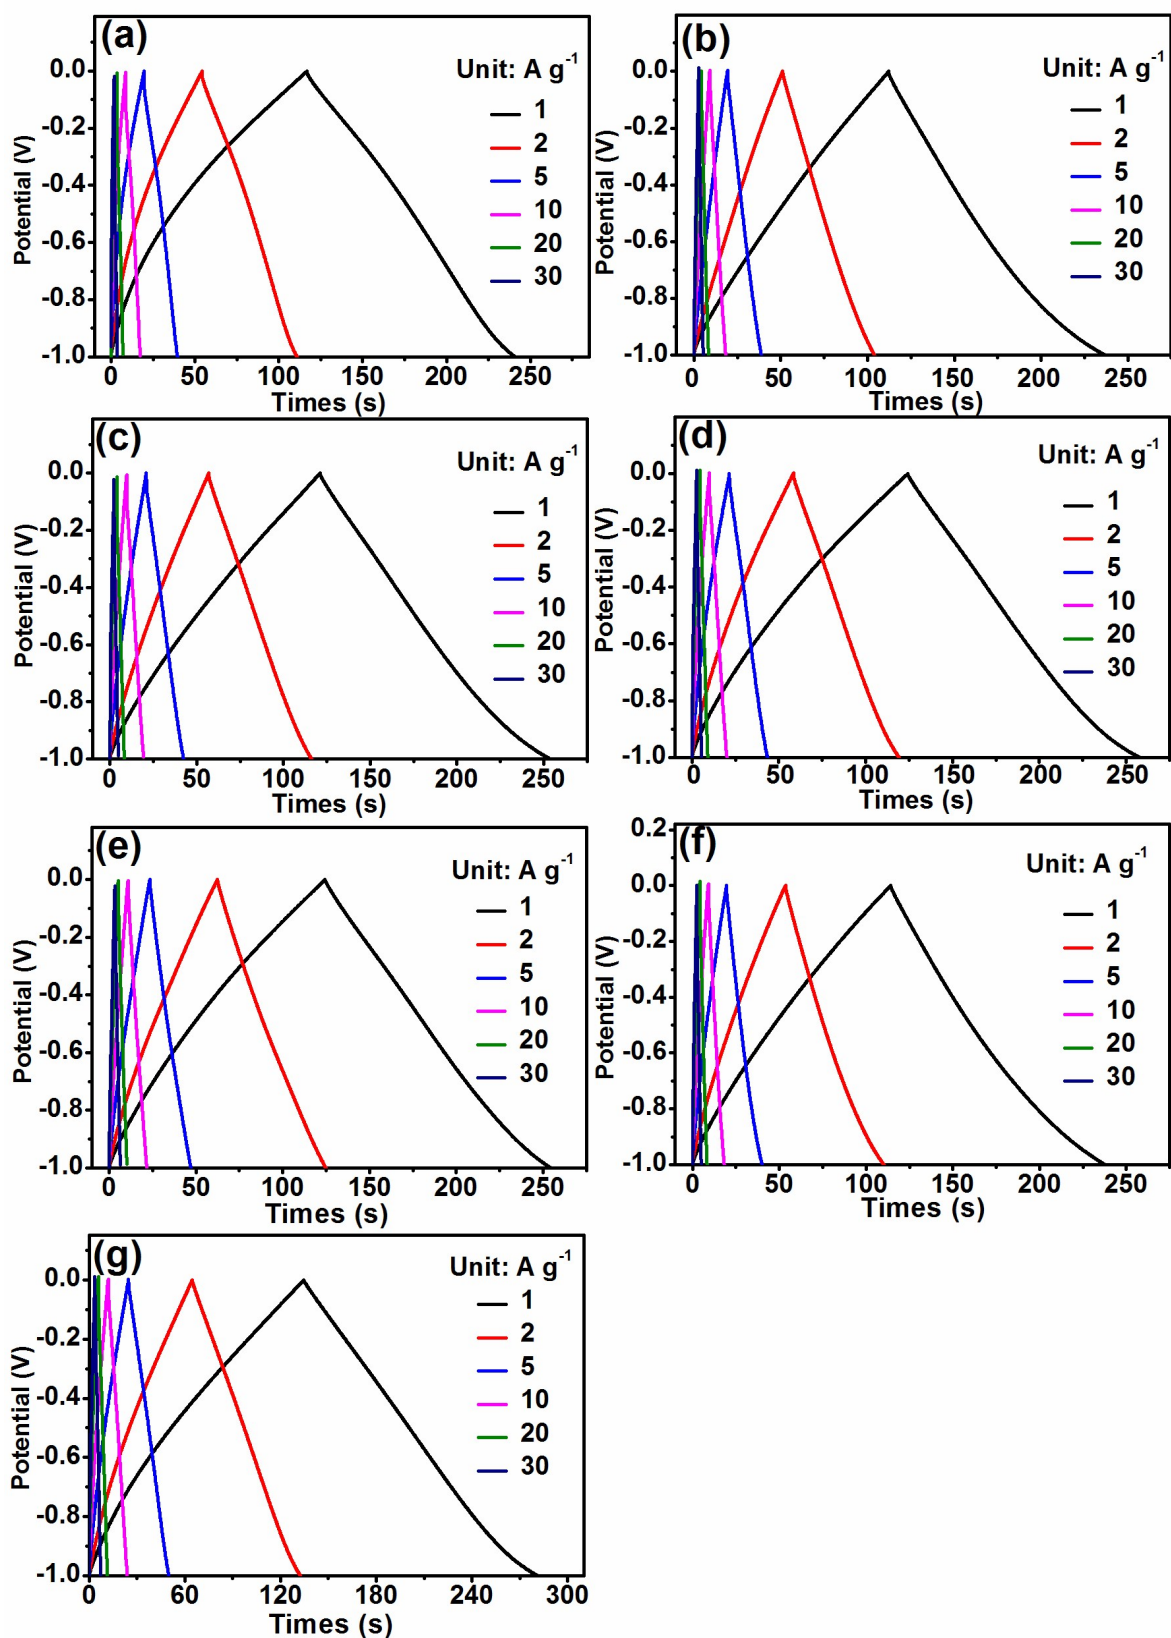

**Fig. S8** GCD curves of the obtained samples at various current densities from 1 to 30  $\text{A g}^{-1}$  in 1  $\text{mol L}^{-1}$   $\text{H}_2\text{SO}_4$  electrolyte in the two-electrode system: (a) ETK-600-1, (b) ETK-700-0, (c) ETK-700-0.5, (d) ETK-700-1.5, (e) ETK-700-2, (f) ETK-800-1, and (g) ETK-700-1.

**Table S1**Detailed quantitative element analysis data.

| Sample      | Atomic ratio (%) |                 |                 |       |       |       |                 |                 |       |       |                  |                 |
|-------------|------------------|-----------------|-----------------|-------|-------|-------|-----------------|-----------------|-------|-------|------------------|-----------------|
|             | C <sub>1s</sub>  | O <sub>1s</sub> | O <sub>1s</sub> |       |       |       | N <sub>1s</sub> | N <sub>1s</sub> |       |       |                  | S <sub>2p</sub> |
|             |                  |                 | C=O             | C-OH  | C-O-C | COOH  |                 | N-6             | N-5   | N-Q   | N-O <sub>x</sub> |                 |
| ETK-600-1   | 85.60            | 10.37           | 17.76           | 31.23 | 25.67 | 25.34 | 3.14            | 15.78           | 47.37 | 26.97 | 9.88             | —               |
| ETK-700-0   | 91.59            | 6.06            | 31.58           | 29.34 | 27.73 | 11.35 | 2.22            | 18.12           | 45.24 | 25.74 | 10.90            | 0.12            |
| ETK-700-0.5 | 94.18            | 4.13            | 27.97           | 29.12 | 22.47 | 20.44 | 1.30            | 23.09           | 34.49 | 23.71 | 18.71            | 0.39            |
| ETK-700-1   | 92.91            | 5.75            | 16.45           | 18.44 | 21.85 | 43.26 | 1.03            | 4.74            | 26.37 | 35.67 | 33.22            | 0.32            |
| ETK-700-1.5 | 96.30            | 3.54            | 31.53           | 30.18 | 17.37 | 20.92 | 0.13            | 28.52           | 19.84 | 19.76 | 31.88            | 0.03            |
| ETK-700-2   | 93.83            | 4.84            | 29.72           | 32.26 | 21.28 | 16.74 | 1.19            | 20.54           | 43.96 | 25.69 | 9.81             | 0.14            |
| ETK-800-1   | 93.72            | 4.83            | 12.82           | 29.01 | 31.78 | 26.39 | 1.43            | 19.76           | 20.55 | 39.17 | 20.52            | 0.02            |
| ET-700-1    | 93.60            | 4.05            | 22.19           | 47.31 | 22.65 | 7.85  | 2.30            | 30.89           | 33.31 | 24.89 | 10.91            | 0.05            |

**Table S2** Comparison of electrochemical performances of the carbon materials synthesized from biomass in supercapacitors.

| Materials      | Surface area<br>[m <sup>2</sup> g <sup>-1</sup> ] | Electrolyte                    | Capacitance<br>[F g <sup>-1</sup> ] | E<br>[Wh kg <sup>-1</sup> ] | P<br>[kW kg <sup>-1</sup> ] | Reference  |
|----------------|---------------------------------------------------|--------------------------------|-------------------------------------|-----------------------------|-----------------------------|------------|
| Egg yolk       | 3519                                              | H <sub>2</sub> SO <sub>4</sub> | 549 <sup>a; b</sup>                 | 12.7                        | 6.0                         | This study |
| Watermelon     | —                                                 | KOH                            | 333 <sup>a; b</sup>                 | —                           | —                           | [S16]      |
| Chitosan       | 1582                                              | KOH                            | 252 <sup>a; c</sup>                 | —                           | —                           | [S17]      |
| Cellulose      | 859                                               | H <sub>2</sub> SO <sub>4</sub> | 328 <sup>a; c</sup>                 | —                           | —                           | [S18]      |
| Cotton         | 2436                                              | KOH                            | 283 <sup>a; b</sup>                 | —                           | —                           | [S19]      |
| Bagasse        | 2064                                              | H <sub>2</sub> SO <sub>4</sub> | 142 <sup>a; c</sup>                 | 19.7                        | 0.5                         | [S20]      |
| Human hair     | 1306                                              | KOH                            | 340 <sup>a; b</sup>                 | 45.3                        | 2.2                         | [S21]      |
| Pomelo Peel    | 2725                                              | KOH                            | 342 <sup>a; e</sup>                 | 9.4                         | 0.1                         | [S22]      |
| Shiitake       | 2988                                              | KOH                            | 306 <sup>a; b</sup>                 | 8.2                         | 13.0                        | [S23]      |
| Mushroom       |                                                   |                                |                                     |                             |                             |            |
| Waste Air-laid | 1470                                              | KOH                            | 296 <sup>a; c</sup>                 | 34.3                        | 0.3                         | [S24]      |
| Paper          |                                                   |                                |                                     |                             |                             |            |
| Waste oily     | 2561                                              | KOH/PVA gel                    | 348 <sup>a; c</sup>                 | 7.22                        | 0.1                         | [S25]      |
| sludge         |                                                   |                                |                                     |                             |                             |            |
| Celtuce Leaves | 3290                                              | KOH                            | 361 <sup>a; b</sup>                 | —                           | —                           | [S26]      |
| Rice husk      | 1768                                              | KOH                            | 233 <sup>a; f</sup>                 | 8.36                        | —                           | [S27]      |
| Coconut Shell  | 2440                                              | H <sub>2</sub> SO <sub>4</sub> | 221.4 <sup>a; g</sup>               | 7.6                         | 4.5                         | [S28]      |
| RF Resins      | 2178                                              | KOH                            | 222 <sup>d; c</sup>                 | 10.1                        | 8.0                         | [S29]      |
| Pomelo Peel    | 2191                                              | KOH                            | 342 <sup>a; b</sup>                 | 17.1                        | 3.8                         | [S30]      |
| Fungus         | 1103                                              | KOH                            | 360 <sup>a; b</sup>                 | 22.0                        | —                           | [S31]      |
| NCAAs          | 1626                                              | KOH                            | 354 <sup>a; e</sup>                 | —                           | —                           | [S32]      |

<sup>(a)</sup> Capacitance with three-electrode system, <sup>(b)</sup>the current density of 1 A g<sup>-1</sup>, <sup>(c)</sup>the current density of 0.5 A g<sup>-1</sup>, <sup>(d)</sup>capacitance with two-electrode system, <sup>(e)</sup>the current density of 0.2 A g<sup>-1</sup>, <sup>(f)</sup>the current density of 2 A g<sup>-1</sup>, <sup>(g)</sup>the current density of 5 A g<sup>-1</sup>.

## Notes and references

- [S1] M. Sevilla, A. B. Fuertes and R. Mokaya, *Energy Environ. Sci.*, 2011, **4**, 1400-1410.
- [S2] X. Wei, H. Zou and S. Gao, *Carbon*, 2017, **123**, 471-480.
- [S3] L. Qie, W. Chen, H. Xu, X. Xiong, Y. Jiang, F. Zou, X. Hu, Y. Xin, Z. Zhang and Y. Huang, *Energy Environ. Sci.*, 2013, **6**, 2497-2504.
- [S4] E. Raymundo-Piñero, P. Azaïs, T. Cacciaguerra, D. Cazorla-Amorós, A. Linares-Solano and F. Béguin, *Carbon*, 2005, **43**, 786-795.
- [S5] J. Gañan, C. M. González-García, J. F. González, E. Sabio, A. Macías-García and M. A. Díaz-Díez, *Appl. Surf. Sci.*, 2004, **238**, 347-354.
- [S6] Y. Sudaryanto, S. B. Hartono, W. Irawaty, H. Hindarso and S. Ismadji, *Bioresour. Technol.*, 2006, **97**, 734-739.
- [S7] X. Wei, Y. Li and S. Gao, *J. Mater. Chem. A*, 2017, **5**, 181-188.
- [S8] T. E. Rufford, D. Hulicova-Jurcakova, K. Khosla, Z. Zhu and G. Q. Lu, *J. Power Sources*, 2010, **195**, 912-918.
- [S9] Z. Sun, S. Wang, L. Yan, M. Xiao, D. Han and Y. Meng, *J. Power Sources*, 2016, **324**, 547-555.
- [S10] X. Li, X. Cheng, M. Gao, D. Ren, Y. Liu, Z. Guo, C. Shang, L. Sun and H. Pan, *ACS Appl. Mater. Interfaces*, 2017, **9**, 10717-10729.
- [S11] X. Wei, H. Zou and S. Gao, *Carbon*, 2017, **123**, 471-480.
- [S12] X. Wei, S. Wan and S. Gao, *Nano Energy*, 2016, **28**, 206-215.
- [S13] C. Di Blasi, C. Branca and A. Galgano, *Polym. Degrad. Stab.*, 2008, **93**, 335-346.
- [S14] J. Gañan, C. M. González-García, J. F. González, E. Sabio, A. Macías-García and M. A. Díaz-Díez, *Appl. Surf. Sci.*, 2004, **238**, 347-354.
- [S15] X. Wei, Y. Li and S. Gao, *J. Mater. Chem. A*, 2017, **5**, 181-188.
- [S16] X. L. Wu, T. Wen, H. L. Guo, S. Yang, X. Wang and A. W. Xu, *ACS Nano*, 2013, **7**, 3589-3597.
- [S17] X. Deng, B. Zhao, L. Zhu and Z. Shao, *Carbon*, 2015, **93**, 48-58.
- [S18] H. Zhuo, Y. Hu, X. Tong, L. Zhong, X. Peng and R. Sun, *Ind. Crops Prod.*, 2016, **87**, 229-235.
- [S19] P. Cheng, T. Li, H. Yu, L. Zhi, Z. Liu and Z. Lei, *J. Phys. Chem. C*, 2016, **120**, 2079-2086.
- [S20] P. Hao, Z. Zhao, J. Tian, H. Li, Y. Sang, G. Yu, H. Cai, H. Liu, C. P. Wong and A. Umar, *Nanoscale*, 2014, **6**, 12120-12129.
- [S21] W. Qian, F. Sun, Y. Xu, L. Qiu, C. Liu, S. Wang and F. Yan, *Energy Environ. Sci.*, 2014, **7**, 379-386.
- [S22] Q. Liang, L. Ye, Z. H. Huang, Q. Xu, Y. Bai, F. Kang and Q. H. Yang, *Nanoscale*, 2014, **6**, 13831-13837.
- [S23] P. Cheng, S. Gao, P. Zang, X. Yang, Y. Bai, H. Xu, Z. Liu and Z. Lei, *Carbon*, 2015, **93**, 315-324.
- [S24] J. Pu, C. Li, L. Tang, T. Li, L. Ling, K. Zhang, Y. Xu, Q. Li and Y. Yao, *Carbon*, 2015, **94**, 650-660.
- [S25] X. Li, K. Liu, Z. Liu, Z. Wang, B. Li and D. Zhang, *Electrochim. Acta*, 2017, **240**, 43-52.
- [S26] R. Wang, P. Wang, X. Yan, J. Lang, C. Peng and Q. Xue, *ACS Appl. Mater. Interfaces*, 2012, **4**, 5800-5806.

- [S27] X. He, P. Ling, M. Yu, X. Wang, X. Zhang and M. Zheng, *Electrochim. Acta*, 2013, **105**, 635-641.
- [S28] A. Jain, C. Xu, S. Jayaraman, R. Balasubramanian, J. Y. Lee and M. P. Srinivasan, *Microporous Mesoporous Mater.*, 2015, **218**, 55-61.
- [S29] H. Xuan, Y. Wang, G. Lin, F. Wang, L. Zhou, X. Dong and Z. Chen, *RSC Adv.*, 2016, **6**, 15313-15319.
- [S30] C. Peng, J. Lang, S. Xu and X. Wang, *RSC Adv.*, 2014, **4**, 54662-54667.
- [S31] C. Long, X. Chen, L. Jiang, L. Zhi and Z. Fan, *Nano Energy*, 2015, **12**, 141-151.
- [S32] J. Zhang, G. Chen, Q. Zhang, F. Kang and B. You, *ACS Appl. Mat. Interfaces*, 2015, **7**, 12760-12766.
